# Supplementary material
Source: PubMed Central journal article supplement (PMC3740835)
Supplement: 1304045110_pnas.201304045SI.pdf [file 1304045110_pnas.201304045SI.pdf]

# Supporting Information

Silvestre et al. 10.1073/pnas.1304045110

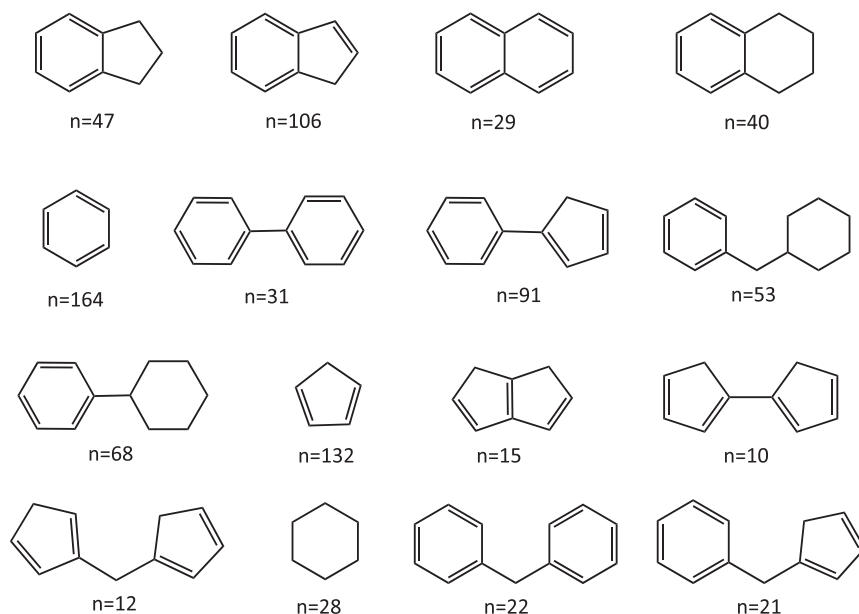

Fig. S1. The structural diversity present in the library used. Graph representation of the scaffolds present, accounting for 70% of the library. The atoms depicted can be assumed to be carbon, nitrogen, oxygen, or sulfur.

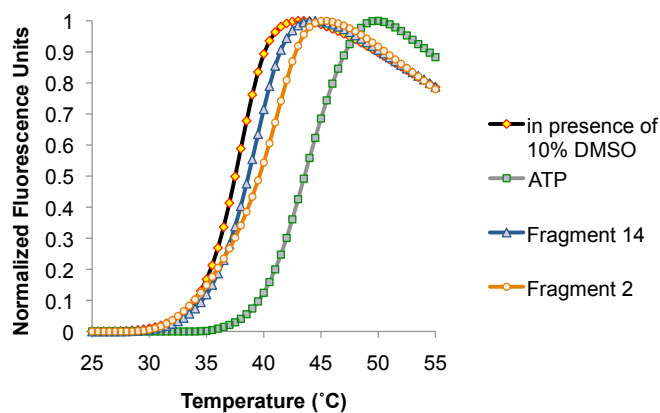

Fig. S2. The thermal unfolding of pantothenate synthetase (*Pts*). The thermal unfolding of *Pts*, in presence of 10% (vol/vol) DMSO, clearly depicts a two-state transition. This behavior is also observed in the presence of substrate (ATP) as well as fragments (as example).

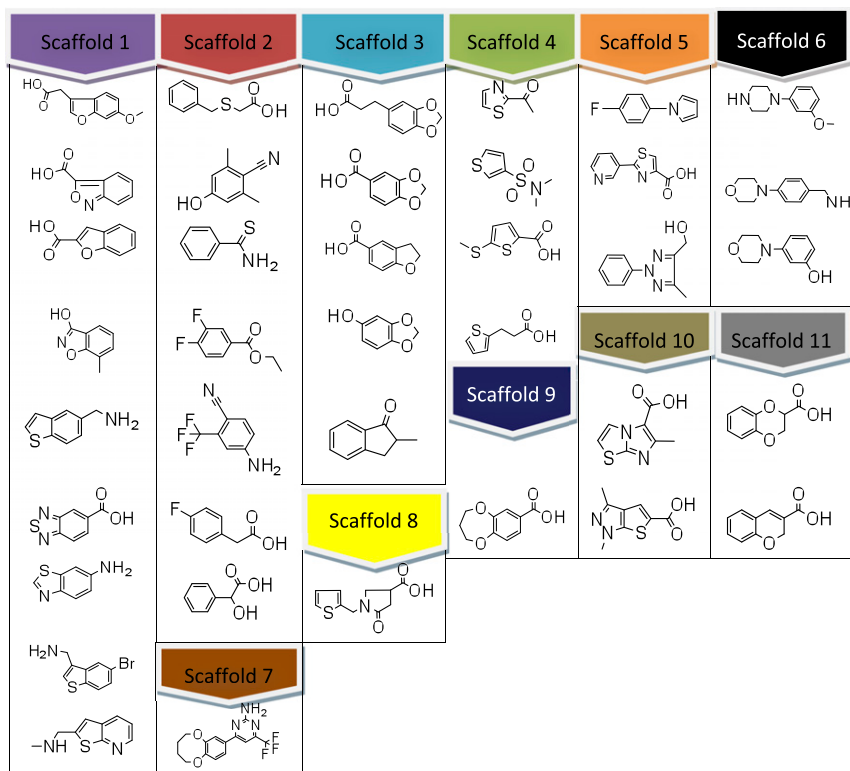

Fig. S3. The 39 fragments found by thermal shift. The hits are classified according to their scaffolds.

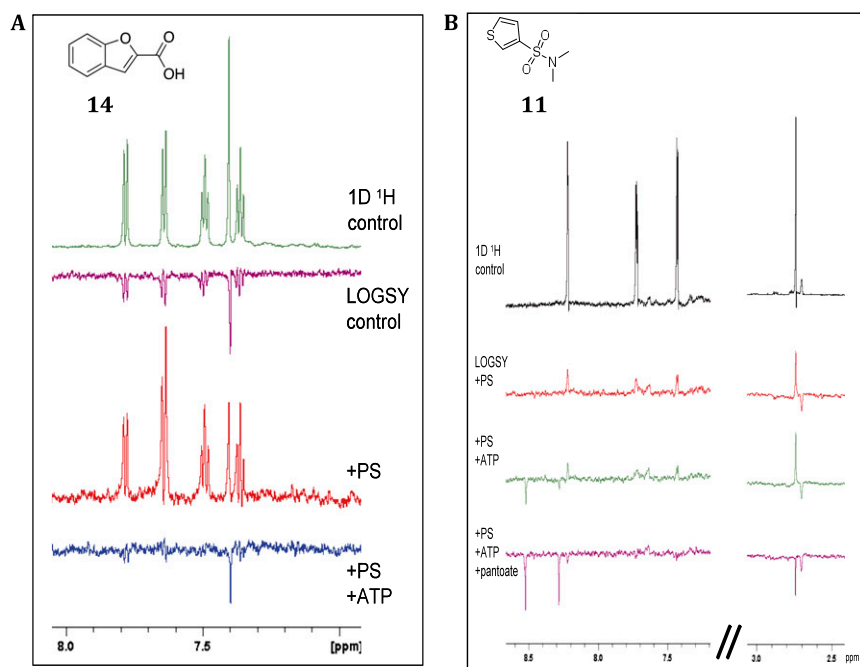

Fig. S4. Water ligand observed gradient spectroscopy NMR experiments to validate fragment binding. Displacement of fragment 14 upon addition of ATP (A), whereas fragment 11 (B) is not displaced upon addition of ATP only but is displaced upon subsequent addition of pantoate.

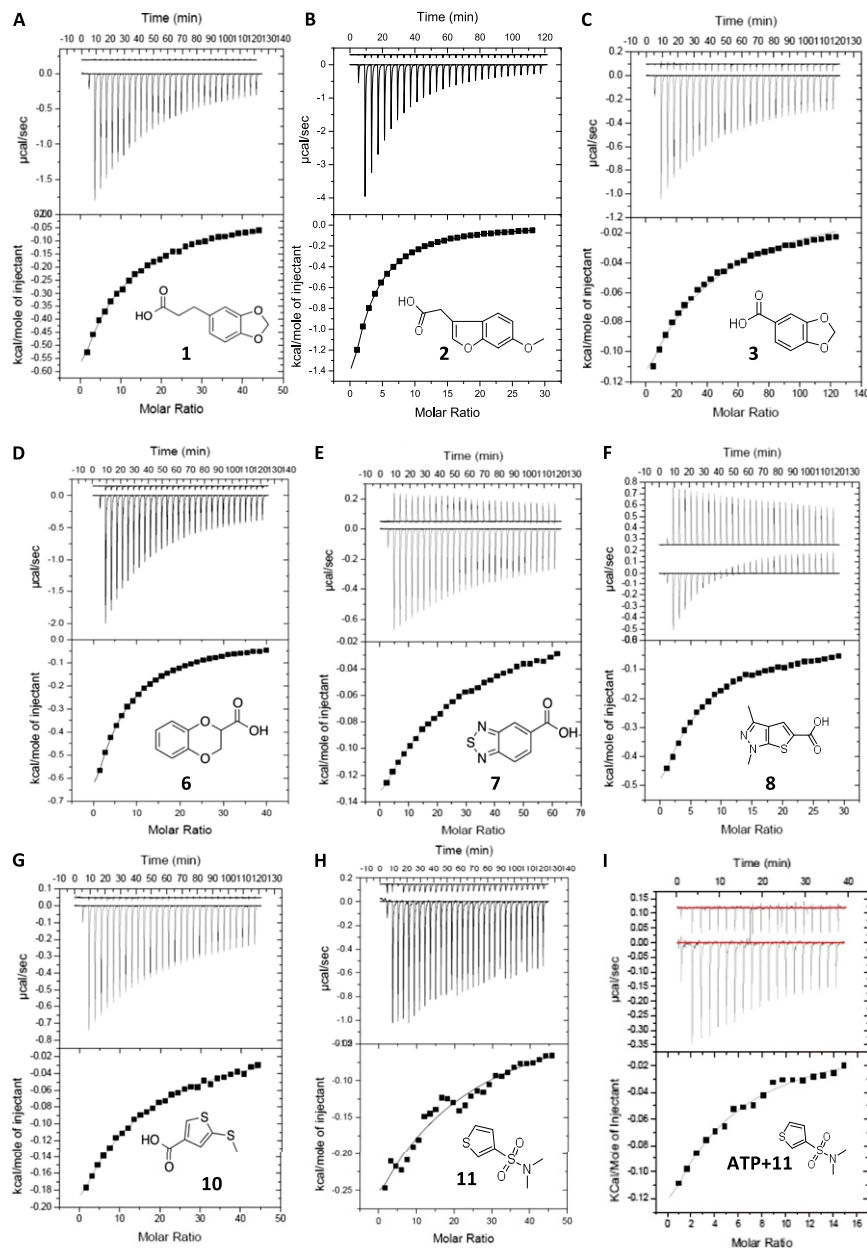

Fig. S5. (Continued)

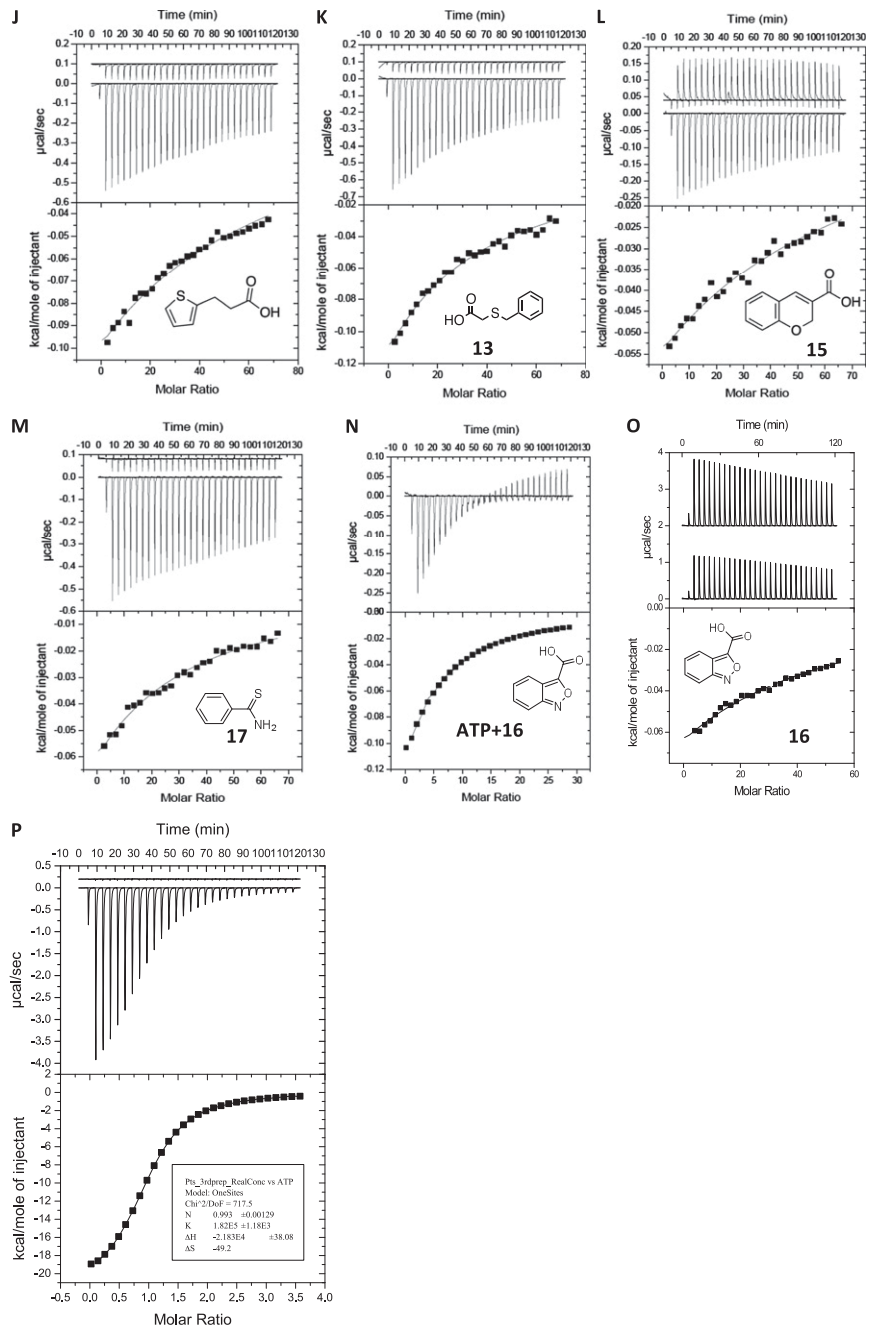

**Fig. S5.** Binding isotherms for 14 of the 17 fragments validated by NMR. For all panels (A–O), the top isotherm represents the heat of dissolution of the fragment in solution, whereas the second isotherm represents the *Pts*–fragment binding titration. *P* depicts a binding isotherm of *Pts*–ATP, which allows the accurate determination of protein concentration, necessary to draw correct conclusions for titrations under low *c*-values.

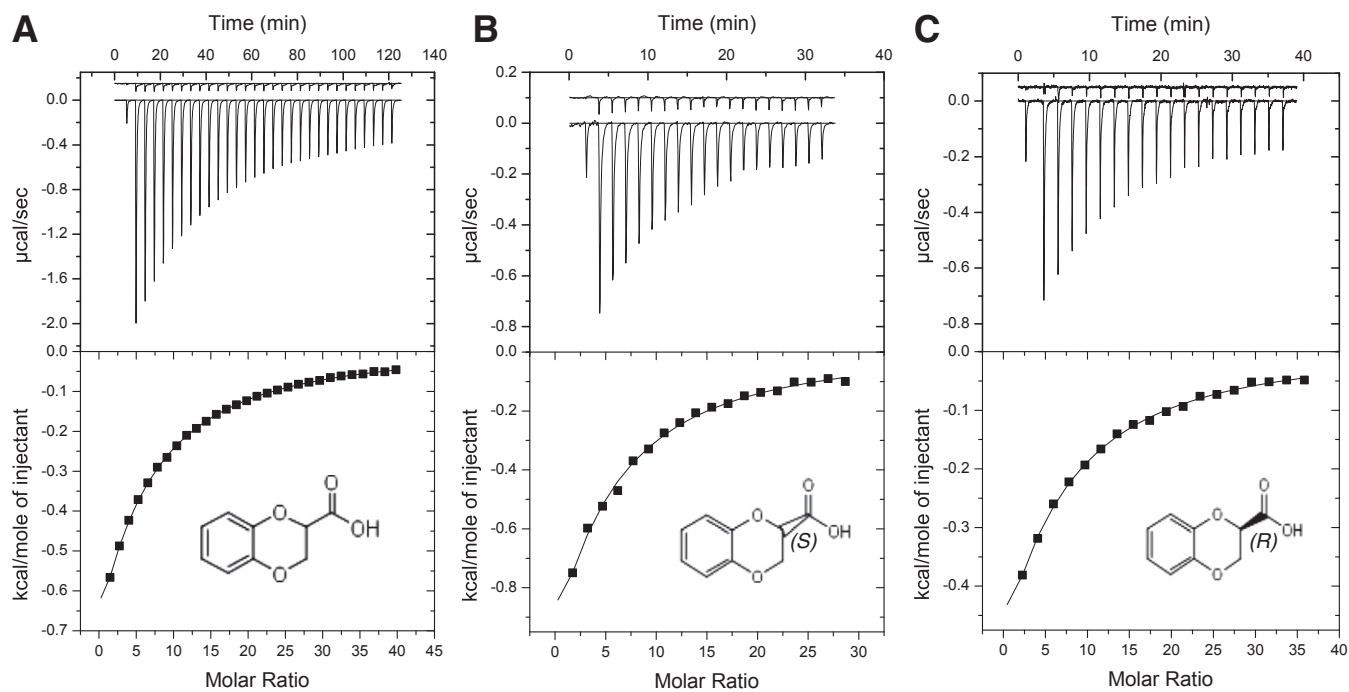

**Fig. S6.** Titrations of *Pts* with racemic and the corresponding enantiopure fragment **6**. The binding isotherm for the racemate mixture of **6**, the *S*-enantiomer, and the *R*-enantiomer are depicted in *A*, *B*, and *C*, respectively. The *S*-enantiomer exhibited slightly higher affinity ( $K_d$  of  $670\ \mu\text{M}$ ). The resulting difference in affinity between the two enantiomers is 1.3-fold.

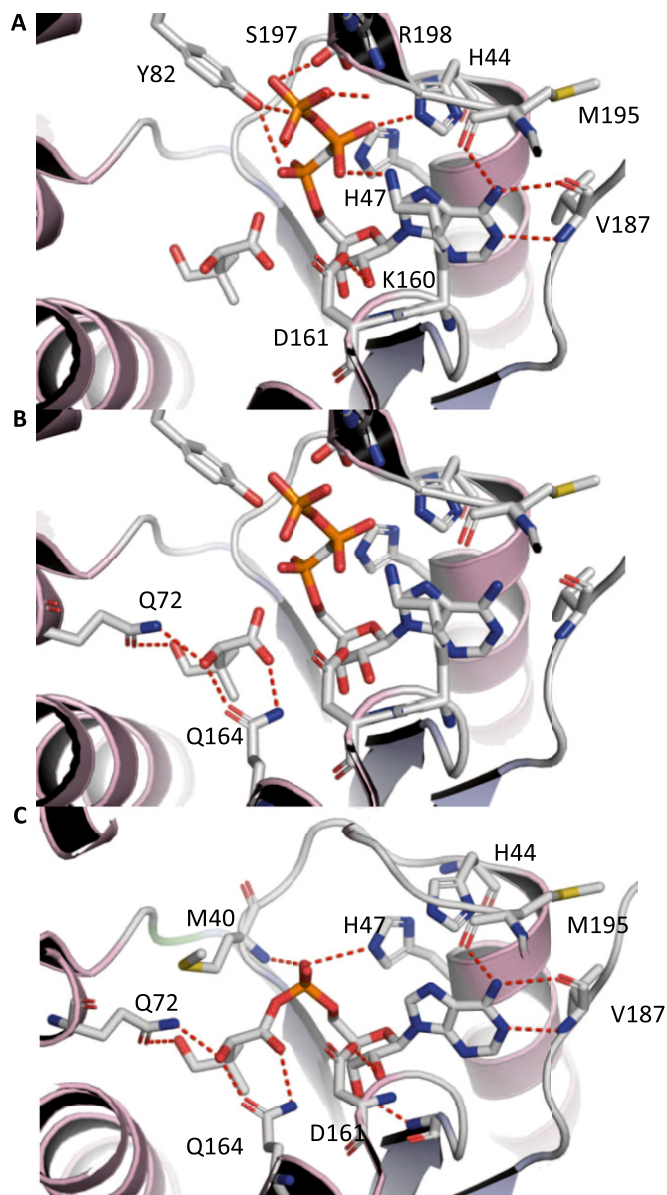

**Fig. S7.** *Pts* bound with the intervening substrates. In *A*, AMPCPP, in *B*, pantoate, and in *C*, the reaction intermediate pantoyladenylate are shown bound to *Pts*. The hydrogen bonds thought to be participating between the intervening substrates and *Pts* are highlighted in red.

**Table S1.** Physicochemical properties of the fragment library used in this study

| Physicochemical properties         | Average | SD   | Rule of three |
|------------------------------------|---------|------|---------------|
| Molecular weight, Da               | 185.0   | 39.1 | <300          |
| Polar surface area, Å <sup>2</sup> | 39.4    | 13.4 | ≤60           |
| Number of rotatable bonds          | 1.85    | 1.15 | ≤3            |
| Hydrogen bond acceptor             | 2.64    | 1.57 | ≤3            |
| Hydrogen bond donor                | 1.23    | 1.10 | ≤3            |
| LogP                               | 1.51    | 0.99 | ≤3            |

**Table S2. Crystallographic data collection and refinement statistics for all new fragment-bound crystal structures resulting from this study and deposited in the Protein Data Bank**

|                                              | Fragment 1          | Fragment 2            | Fragment 3             | Fragment 6             | Fragment 8             | Fragment 7             | Fragment 11        | Fragment 11 + ATP      |
|----------------------------------------------|---------------------|-----------------------|------------------------|------------------------|------------------------|------------------------|--------------------|------------------------|
| <b>Data Collection</b>                       |                     |                       |                        |                        |                        |                        |                    |                        |
| Protein Data Bank ID code                    | 4EF6                | 4DDH                  | 4DDK                   | 4G5F                   | 4FZJ                   | 4DDM                   | 4EFK               | 4G5Y                   |
| X-Ray Source                                 | SLS, PXIII          | SLS, PXIII            | ESRF, ID14-1           | SLS, PXIII             | DLS, I03               | SLS, PXIII             | ESRF, ID29         | ESRF, ID29             |
| Space Group                                  | P2 <sub>1</sub>     | P2 <sub>1</sub>       | P2 <sub>1</sub>        | P2 <sub>1</sub>        | P2 <sub>1</sub>        | P2 <sub>1</sub>        | P2 <sub>1</sub>    | P2 <sub>1</sub>        |
| Cell Parameters ( $\alpha=\gamma=90^\circ$ ) |                     |                       |                        |                        |                        |                        |                    |                        |
| a (Å)                                        | 48.12               | 48.62                 | 48.19                  | 48.41                  | 48.29                  | 48.44                  | 48.45              | 48.26                  |
| b (Å)                                        | 70.70               | 70.95                 | 70.71                  | 70.99                  | 70.90                  | 71.02                  | 71.78              | 71.06                  |
| c (Å)                                        | 82.11               | 82.00                 | 81.69                  | 81.68                  | 81.83                  | 82                     | 81.91              | 81.65                  |
| $\beta^\circ$                                | 99.40               | 99.40                 | 99.14                  | 99.58                  | 99.54                  | 99.5                   | 99.55              | 99.35                  |
| Resolution range, Å (outer shell)            | 38–1.94 (2.04–1.94) | 53.3–2.07 (2.16–2.07) | 26.58–1.75 (1.84–1.75) | 47.73–2.33 (2.46–2.33) | 53.26–1.63 (1.72–1.63) | 28.61–1.85 (1.95–1.85) | 30–1.7 (1.74–1.70) | 40.28–1.80 (1.90–1.80) |
| No. of unique reflections                    | 40,119              | 34,573                | 49,951                 | 23,179                 | 66,694                 | 46,927                 | 60,243             | 50,752                 |
| Multiplicity                                 | 4.2                 | 4.4                   | 2.9                    | 3.6                    | 2.6                    | 4.5                    | 3.5                | 4.1                    |
| R <sub>merge</sub> % (outer shell)           | 11.5 (66.8)         | 12.3 (54.5)           | 7.9 (42.7)             | 11.3 (47.7)            | 7.3(59.6)              | 6.5 (46.8)             | 6.1 (42.8)         | 5.4 (37.2)             |
| Average $I/\sigma(I)$                        | 12 (1.7)            | 13.8 (3.8)            | 7.9 (2.4)              | 7.5 (2.6)              | 8,2 (1.8)              | 17 (2.9)               | 12.8 (2.1)         | 15.3                   |
| Completeness % (outer shell)                 | 99.5 (96.5)         | 99.8 (99.9)           | 91.5 (89.5)            | (98.6) 90.7            | 98.2 (98.4)            | 100 (100)              | 99.0 (91.0)        | 99.6 (99.3)            |
| Mosaicity, °                                 | 0.65                | 0.65                  | 0.6                    | 1.2                    | 0.33                   | 0.7                    | 0.48               | 0.21                   |
| Wilson B, Å <sup>2</sup>                     | 20.5                | 23                    | 16.1                   | 31.7                   | 19                     | 22.51                  | 29.8               | 31.2                   |
| <b>Refinement</b>                            |                     |                       |                        |                        |                        |                        |                    |                        |
| Resolution range                             | 81.11–1.94          | 80.85–2.07            | 80.58–1.75             | 80–2.33                | 80.85–1.63             | 80.85–1.85             | 80.99–1.7          | 37.57–1.80             |
| R <sub>cryst</sub> %*                        | 0.17                | 0.19                  | 0.18                   | 0.17                   | 0.17                   | 0.16                   | 0.17               | 0.16                   |
| R <sub>free</sub> % <sup>†</sup>             | 0.22                | 0.25                  | 0.24                   | 0.23                   | 0.21                   | 0.22                   | 0.21               | 0.21                   |
| Number of reflections                        |                     |                       |                        |                        |                        |                        |                    |                        |
| Working set                                  | 38,082              | 31,737                | 47,412                 | 21,974                 | 63,290                 | 45,985                 | 35,104             | 48,205                 |
| Test set                                     | 2,634               | 1,694                 | 2,371                  | 1,191                  | 3,382                  | 3,385                  | 1,846              | 2,542                  |
| Ligands bound to active site                 |                     |                       |                        |                        |                        |                        |                    |                        |
| Water molecules                              | 489                 | 487                   | 565                    | 232                    | 448                    | 249                    | 391                | 404                    |
| Ligand                                       | 2                   | 2                     | 2                      | 2                      | 1                      | 2                      | 2                  | 2                      |
| Glycerol                                     | 5                   | 2                     | 4                      | 2                      | 1                      | 1                      | 3                  | 2                      |
| Ethylene glycol                              | 3                   | 2                     | 1                      | 2                      | 1                      | 1                      | 0                  | 0                      |

DLS, Diamond Light Source; ESRF, European Synchrotron Radiation Facility; PXIII, Protein Crystallography III (refers to the beam station from where the data was collected, analogous to "ID14-1"); SLS, Swiss Light Source.

\* $R_{cryst} = \sum |F_{obs} - F_{calc}| / \sum |F_{obs}|$ , and  $F_{obs}$  and  $F_{calc}$  are observed and calculated structure factor amplitudes.

<sup>†</sup> $R_{free}$  as for  $R_{cryst}$  using a random subset of the data excluded from the refinement.
